# Supplementary material for: Multiplexed Echo Planar Imaging for Sub-Second Whole Brain FMRI and Fast Diffusion Imaging
Source: PLOS journal article supplement (doi:10.1371/journal.pone.0015710), 2010-12-20
Supplement: S6 (10.1371/journal.pone.0015710.s006) [file journal.pone.0015710.s006]

| SIR x MB (mxn) | 2 <sup>nd</sup> To 1 <sup>st</sup> | 3 <sup>rd</sup> To 1 <sup>st</sup> | 1 <sup>st</sup> Dispersion | 2 <sup>nd</sup> Dispersion | 3 <sup>rd</sup> Dispersion |
|----------------|------------------------------------|------------------------------------|----------------------------|----------------------------|----------------------------|
| 1 x 1          | .606                               | .050                               | .0381                      | .079                       | .112                       |
| 1 x 2          | .626                               | .046                               | .0321                      | .069                       | .099                       |
| 2 x 1          | .492                               | .034                               | .0637                      | .105                       | .138                       |
| 2 x 2          | .462                               | .021                               | .0647                      | .105                       | .149                       |

Table S3
